# Supplementary material
Source: PubMed Central journal article supplement (PMC1995136)
Supplement: cmaj_177_8_859_v2_1.pdf [file cmaj_177_8_859_v2_1.pdf]

## Appendix 1: Simon Fraser Heart Health Report Card

Below is an example of a patient's cardiovascular risk status that was determined using the report card.

### Summary of Risk for Heart Disease

| Personal Data           | You            | Your Target Level | Lowest Risk Level |
|-------------------------|----------------|-------------------|-------------------|
| Total Cholesterol       | D = 6.4        | C = 5.18–6.21     | < 4.14            |
| HDL Cholesterol         | D = 1.1        | C = 1.17–1.29     | > 1.56            |
| Systolic Blood Pressure | C = 136        | B = 120–129       | < 120             |
| Diabetes Status         | F = 15.9       | D = 7.1–10.0      | None              |
| Smoking Status          | A = non-smoker | Maintain          | None              |
| Risk Factors            | Letter Grade   |                   |                   |
| Total Cholesterol       | D              |                   |                   |
| HDL Cholesterol         | D              |                   |                   |
| Systolic Blood Pressure | C              |                   |                   |
| Diabetes Status         | F              |                   |                   |
| Smoking Status          | A              |                   |                   |

The bar graph below represents your overall risk for heart attack. Risk factors contribute to your overall risk of a heart event. These ratings are based on numerous scientific studies conducted over the past 40 years.

| Your Absolute Risk       | Low < 10%                                                                           | Moderate 10%–19% | High ≥ 20% |
|--------------------------|-------------------------------------------------------------------------------------|------------------|------------|
| Percentage Over 10 years |  |                  |            |

**OVERALL LETTER GRADE FOR CARDIOVASCULAR RISK STATUS**

**C**

### Lifestyle Report Card

#### Summary of Lifestyle Factors for Heart Disease

| Lifestyle Factors   | Risk Level                                                                          |          |      | Letter Grade |
|---------------------|-------------------------------------------------------------------------------------|----------|------|--------------|
|                     | Low                                                                                 | Moderate | High |              |
| Smoking             |  |          |      | A            |
| Physical Activity   |  |          |      | F            |
| Nutrition           |  |          |      | A            |
| Stress              |  |          |      | C            |
| Body Mass Index     |  |          |      | F            |
| Waist Circumference |  |          |      | F            |
| Health Confidence   |  |          |      | C            |

| Lifestyle Factors   | You                      | Your Target Level        | Lowest Risk Level                  |
|---------------------|--------------------------|--------------------------|------------------------------------|
| Smoking             | Non-smoker               | Maintain                 | Non-Smoker                         |
| Physical Activity   | 0–2 x/wk<br>0–10 min     | D = 2–3x/wk<br>11–20 min | A = 4–6 x/wk<br>41+ min            |
| Nutrition           | 4/4 in the 4 food groups | Maintain                 | A = choices from all 4 food groups |
| Stress              | 7/10                     | B = 3–5/10               | A=0–2/10                           |
| Body Mass Index     | 38.5                     | C ≤ 29                   | A ≤ 25                             |
| Waist Circumference | 115 cm                   | C ≤ 96 cm                | A ≤ 88 cm                          |
| Health Confidence   | C = fair                 | B = good                 | A = excellent                      |

© 2007 Andrew Wister, Nadine Loewen, Holly Kennedy-Symonds, Brian McGowan, Bonnie McCoy, Joel Singer.

Appendix to: Wister A, Loewen N, Kennedy-Symonds H, et al. One-year follow-up of a therapeutic lifestyle intervention targeting cardiovascular disease risk. *CMAJ* 2007;177(8):859-65.
